# Supplementary material for: Efficacy and Safety of Topical Clascoterone Cream, 1%, for Treatment in Patients With Facial Acne: Two Phase 3 Randomized Clinical Trials
Source: PubMed Central journal article supplement — JAMA Dermatol. 2020 Apr 22;156(6):1–10. doi: 10.1001/jamadermatol.2020.0465 (PMC7177662; doi:10.1001/jamadermatol.2020.0465), 2020-04-22
Supplement: jamadermatol-156-621-s003.pdf [file jamadermatol-156-621-s003.pdf]

## **Data Sharing Statement**

Hebert. Efficacy and Safety of Topical Clascoterone Cream, 1%, for Treatment in Patients With Facial Acne. *JAMA Dermatol*. Published April 22, 2020. 10.1001/jamadermatol.2020.0465

### **Data**

**Data available:** No
